# Supplementary material for: Superior photocatalytic properties of phosphorous-doped ZnO nanocombs
Source: Royal Society of Chemistry journal article supplement (doi:10.1039/c3ra44003f), 2013-01-01
Supplement: c3ra44003f.pdf [file c3ra44003f.pdf]

# **Superior photocatalytic properties of phosphorous-doped ZnO nanocombs**

**Shufan Xie, Yangyang Liu, Zhenlu Chen, Xiaodong Chen and Xianying Wang\***

School of Materials Science and Engineering, University of Shanghai for Science and Technology, Shanghai 200093, China.

\*E-mail: [xianyingwang@usst.edu.cn](mailto:xianyingwang@usst.edu.cn)

**Figure S1-S2**

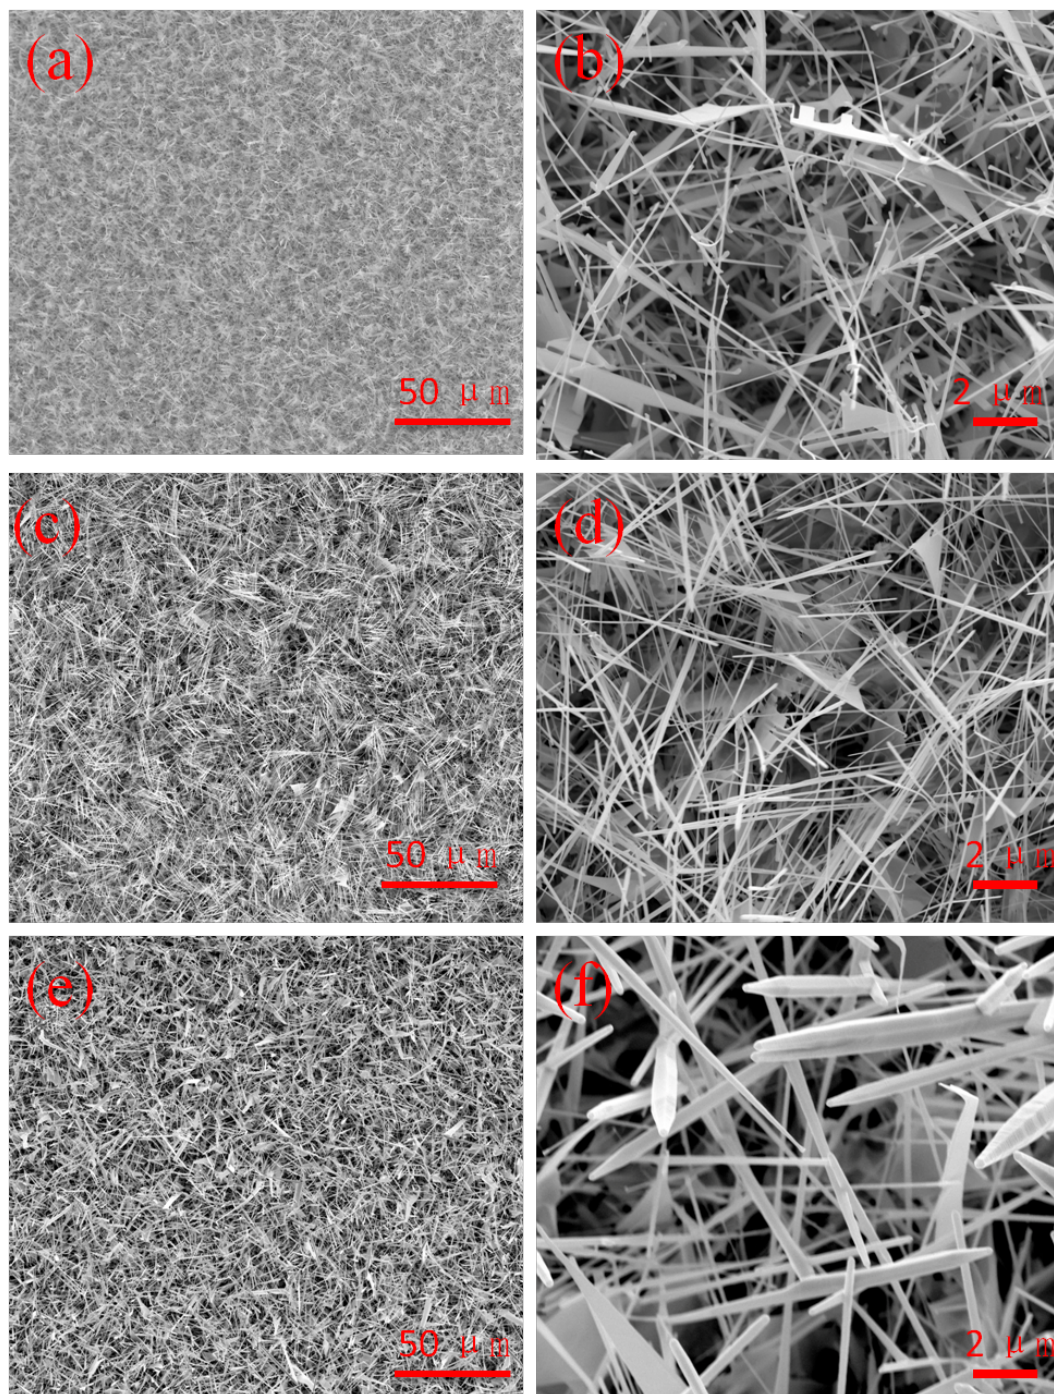

**Fig.S1** A comparison of P-doped ZnO nanostructures grown under different oxygen flow rates of (a)-(b) 0 sccm, (c)-(d) 20 sccm, (e)-(f) 30 sccm, respectively. (a),(c) and (e) are low magnification images. (b), (d) and (f) are high magnification images. No comb-like structures were observed in these images.



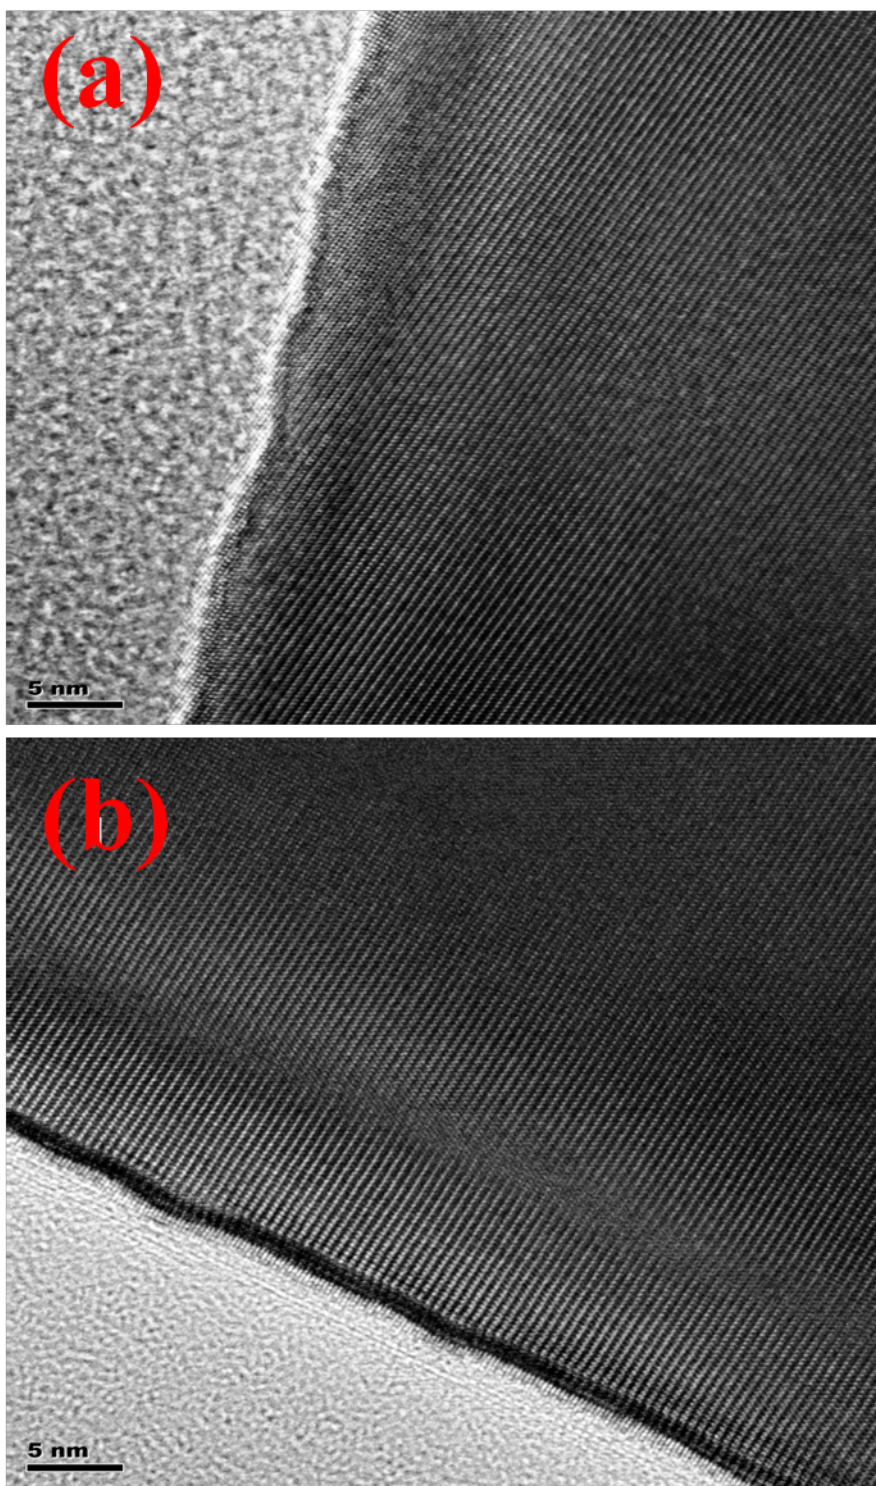

**Fig.S2** HRTEM images taken from (a) the nanoribbon area, (b) the nanorod area.

**Table 1: A summary of  $C/C_0$  value at different time intervals when the amount of photocatalysts are 0 mg, 20 mg, 40 mg and 60 mg respectively. The measured data of  $C_0$  is 1.820. “-60 mins” is corresponding to the time dark-stirring begins. “0 mins” is the time UV irradiation begins.**

| Amounts<br>Time (mins) | 0 mg    | 20 mg   | 40 mg   | 60 mg   |
|------------------------|---------|---------|---------|---------|
| -60                    | 1       | 1       | 1       | 1       |
| 0                      | 1.006   | 0.998   | 0.997   | 1.001   |
| 10                     | 1.01357 | 0.9786  | 0.58875 | 0.15884 |
| 20                     | 1.02374 | 0.87724 | 0.35012 | 0.03165 |
| 30                     | 1.00436 | 0.69675 | 0.21027 | 0.02923 |
| 40                     | 1.00727 | 0.6647  | 0.11149 | 0.01648 |
| 50                     | 1.00775 | 0.65163 | 0.07726 | 0.01692 |
| 60                     | 1.00097 | 0.57739 | 0.06161 | 0.01956 |
